# Supplementary material for: Premedication with intranasal dexmedetomidine decreases barbiturate requirement in pediatric patients sedated for magnetic resonance imaging: a retrospective study
Source: PubMed Central journal article supplement (PMC6374898; doi:10.1186/s12871-019-0690-1), 2019-02-13
Supplement: 12871_2019_690_MOESM1_ESM.pdf [file 12871_2019_690_MOESM1_ESM.pdf]

Assessed for eligibility (n=490)

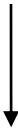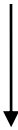

Sedation with thiopental only  
(n=241)

Sedation with dexmedetomidine  
premedication (n=249)

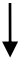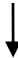

Not meeting inclusion criteria (n=141)  
◆ ASA > 2 (n=54)  
◆ Growth SD < -1.5 or > 1.5 (n=18)  
◆ Age > 11 years (n=41)  
◆ Use of other sedatives (n=13)  
◆ Missing data (n=15)

Not meeting inclusion criteria (n=149)  
◆ ASA > 2 (n=49)  
◆ Growth SD < -1.5 or > 1.5 (n=13)  
◆ Age > 11 years (n=68)  
◆ Use of other sedatives (n=5)  
◆ Missing data (n=14)

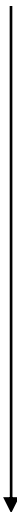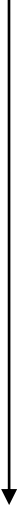

Included to analysis (n=100)

Included to analysis (n=100)

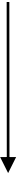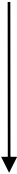

Analysed (n=200)
