# Supplementary material for: Premedication with intranasal dexmedetomidine decreases barbiturate requirement in pediatric patients sedated for magnetic resonance imaging: a retrospective study
Source: PubMed Central journal article supplement (PMC6374898; doi:10.1186/s12871-019-0690-1), 2019-02-13
Supplement: 12871_2019_690_MOESM2_ESM.pdf [file 12871_2019_690_MOESM2_ESM.pdf]

**Supplemental Table 1:** Diagnostic categories and the type of MRI study conducted for the patients. Patients in DEX-group received intranasal administration of 3 µg/kg dexmedetomidine before magnetic resonance imaging, while patients in THIO group received no premedication before MRI.

|                                  | Dexmedetomidine |      |      |      | Thiopental |       |       |       |
|----------------------------------|-----------------|------|------|------|------------|-------|-------|-------|
|                                  | DEX ALL         | DEX1 | DEX2 | DEX3 | THIO ALL   | THIO1 | THIO2 | THIO3 |
| <b>Diagnostic categories (n)</b> | 100             | 20   | 50   | 30   | 100        | 24    | 53    | 23    |
| Neurology                        | 21              | 3    | 11   | 7    | 24         | 5     | 11    | 8     |
| Neurosurgery                     | 7               | 2    | 4    | 1    | 8          | 1     | 7     | 0     |
| Ophthalmology                    | 4               | 1    | 3    | 0    | 4          | 0     | 3     | 1     |
| Hematology/Oncology              | 8               | 0    | 3    | 5    | 7          | 1     | 5     | 1     |
| Genetic                          | 5               | 0    | 2    | 3    | 8          | 2     | 5     | 1     |
| Rheumatologic                    | 17              | 3    | 9    | 5    | 12         | 0     | 5     | 7     |
| Trauma                           | 16              | 3    | 9    | 4    | 11         | 6     | 4     | 1     |
| Other                            | 22              | 8    | 9    | 5    | 26         | 9     | 13    | 4     |
| <b>Type of MRI (n)</b>           |                 |      |      |      |            |       |       |       |
| Head                             | 52              | 11   | 26   | 15   | 59         | 16    | 30    | 13    |
| Extremity                        | 21              | 4    | 11   | 6    | 16         | 3     | 8     | 5     |
| Spine                            | 8               | 2    | 4    | 2    | 7          | 1     | 3     | 3     |
| Pelvis                           | 5               | 1    | 3    | 1    | 4          | 1     | 2     | 1     |
| Whole body                       | 3               | 0    | 1    | 2    | 7          | 2     | 4     | 1     |
| Abdomen                          | 7               | 2    | 2    | 3    | 3          | 1     | 2     | 0     |
| Other                            | 4               | 0    | 3    | 1    | 4          | 0     | 4     | 0     |
